# Supplementary material
Source: ML conference proceedings conference paper supplement (https://proceedings.neurips.cc/paper_files/paper/2022/hash/3c4688b6a76f25f2311daa0d75a58f1a-Abstract.html)
Supplement: Supplementary file 1 [file 3c4688b6a76f25f2311daa0d75a58f1a-Supplemental-Datasets_and_Benchmarks.zip]

Archive with 6 entries (6 files):
- 1_Elevater_benchmark_appendix.pdf
- 3_Toolkit_IC_neurips.zip
- 2.1_IC_datasets_results_neurips.xlsx
- 0_ReadMe.txt
- 2.2_OD_datasets_results_neurips.xlsx
- 4_Toolkit_OD_neurips.zip
