# Supplementary material
Source: ML conference proceedings conference paper supplement (https://proceedings.neurips.cc/paper_files/paper/2022/hash/3c4688b6a76f25f2311daa0d75a58f1a-Abstract.html)
Supplement: Supplementary file 1 [file 3c4688b6a76f25f2311daa0d75a58f1a-Supplemental-Datasets_and_Benchmarks.zip › 0_ReadMe.txt]

Content of Supplementary Material


- Elevater_benchmark_appendix.pdf
The Appendix PDF to the ELEVATER main paper.


- IC_datasets_results_neurips
The detailed breakdown baseline results for 20 image classification datasets on the ELEVATER benchmark.

- OD_datasets_results_neurips
The detailed breakdown baseline results for 35 object detection datasets on the ELEVATER benchmark.


- Toolkit_IC_neurips.zip
The toolkit for image classifcation.


- Toolkit_OD_neurips.zip
The toolkit for object detection.


- To download the full datasets & knowledge before running experiments
https://github.com/Computer-Vision-in-the-Wild/DataDownload
